# Supplementary material
Source: PubMed Central journal article supplement (PMC4737929)

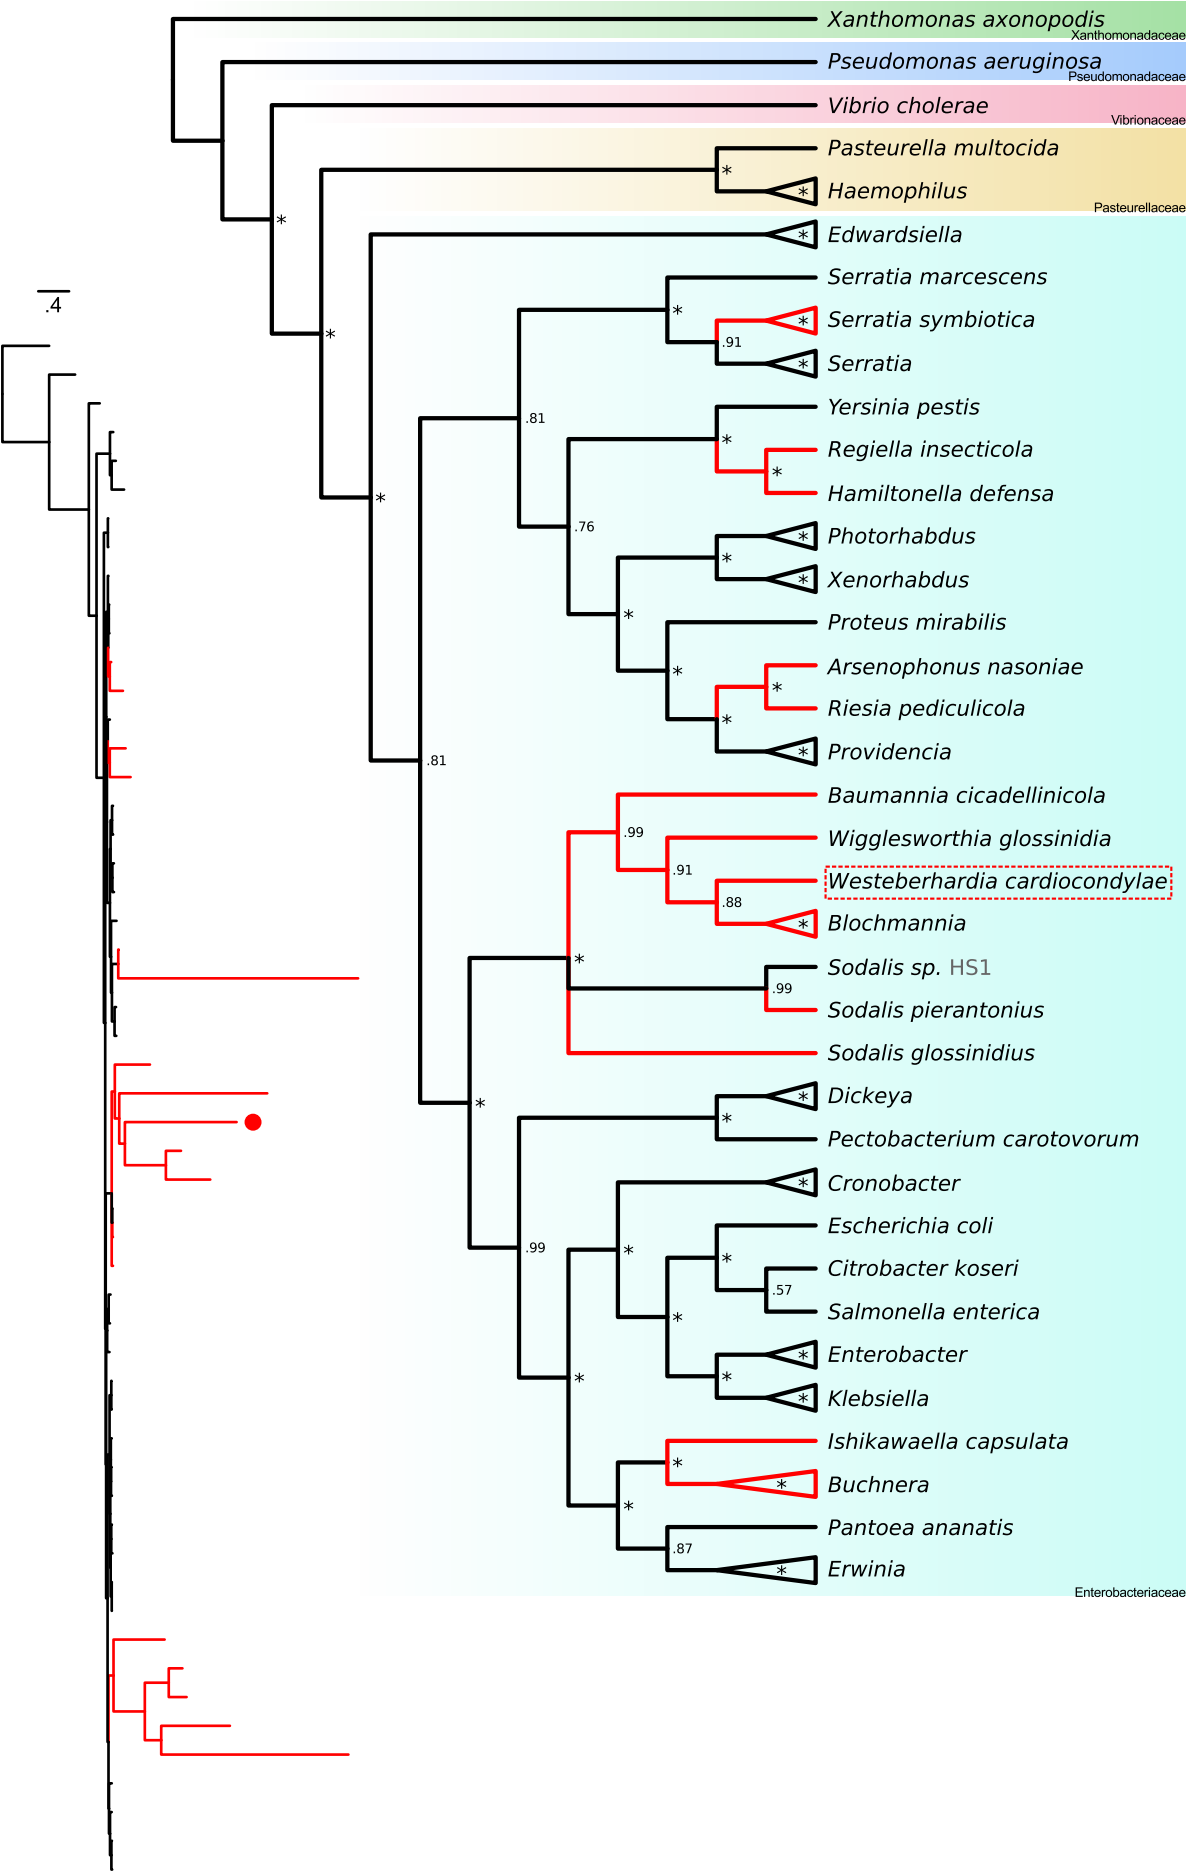

Supplement: ismej2015119x2.pdf [file ismej2015119x2.pdf]
